# Supplementary material for: Implicit rule on the elastic function of a swollen polyacrylamide hydrogel
Source: Royal Society of Chemistry journal article supplement (doi:10.1039/d1sm00346a), 2021-01-01
Supplement: d1sm00346a1.pdf [file d1sm00346a1.pdf]

## Supplementary Information

### Implicit rule on the elastic function of a swollen polyacrylamide hydrogel

**Ryota Kawai**<sup>a,†</sup>, **Hiro Tanaka**<sup>b,†</sup>, **Seishiro Matsubara**<sup>a</sup>, **Shohei Ida**<sup>c</sup>, **Makoto Uchida**<sup>d</sup>,  
**Dai Okumura**<sup>a,\*</sup>

<sup>a</sup> Department of Mechanical System Engineering, Nagoya University, Furo-cho, Chikusa-ku, Nagoya 464-8603, Japan

<sup>b</sup> Department of Mechanical Engineering, Osaka University, 2-1 Yamadaoka, Suita, Osaka 565-0871, Japan

<sup>c</sup> Graduate School of Engineering, Osaka City University, 3-3-138, Sugimoto, Sumiyoshi-ku, Osaka 558-8585, Japan

<sup>d</sup> Faculty of Engineering, The University of Shiga Prefecture, 2500, Hassaka-cho, Hikone-City, Shiga 522-8533, Japan

\* Corresponding author: dai.okumura@mae.nagoya-u.ac.jp

† These authors contributed equally.

### Captions for Supplementary Tables and Figures

**Figure S1:** Variations for Figs. 3(a) and (b), which shows the double logarithmic plots with base ten for (a)  $G_{AP}$  and (b)  $G_{ES}$  with respect to  $J_{ES}/J_{AP}$ . Note that the sample number is  $n = 3$ .

**Figure S2:** Filled circles of (a)  $E_{ID}(X, Y)$  calculated using  $\{J_{AP}, E_{AP}\}$  in Eq. (9), (b)  $m(X, Y)$  calculated using  $\{J_{AP}, J_{ES}, E_{AP}, E_{ES}\}$ , and (c)  $n(X, Y)$  calculated using  $\{J_{ES}, E_{ID}\}$ , where  $a = 0$ ,  $kT = 4.11 \times 10^{-21}$  J,  $v = 2.99 \times 10^{-29}$  m<sup>3</sup>, and  $\chi = 0.49$ .

**Figure S3:** Filled circles of (a)  $n(X, Y)$  calculated with  $\{J_{ES}, E_{ID}\}$  and  $a = 0$ , (b)  $n'(X, Y)$  with  $\{J'_{ES}, E'_{ID}\}$  and  $a = 0$ , (c)  $n(X, Y)$  with  $\{J_{ES}, E_{ID}\}$  and  $a = 2$ , and (d)  $n'(X, Y)$  with  $\{J'_{ES}, E'_{ID}\}$  and  $a = 2$ , where,  $kT = 4.11 \times 10^{-21}$  J,  $v = 2.99 \times 10^{-29}$  m<sup>3</sup>, and  $\chi = 0.49$ . Note that Figs. S2(a) and (b) are consistent with Figs. 9(a) and (b) in the main text.

**Figure S4:** Relationship between the two exponents of  $(m', n')$  for (a)  $a = 0$  and (b)  $a = 2$ .

**Table S1:** Volume swelling ratios ( $J_{AP}$  and  $J_{ES}$ ) for each hydrogel formulation.

**Table S2:** Standard deviations of  $\alpha_{AP}$ ,  $\alpha_{ES}$ , and  $\beta$  under the as-prepared and equilibrium stable states of hydrogels as listed in Table 3.

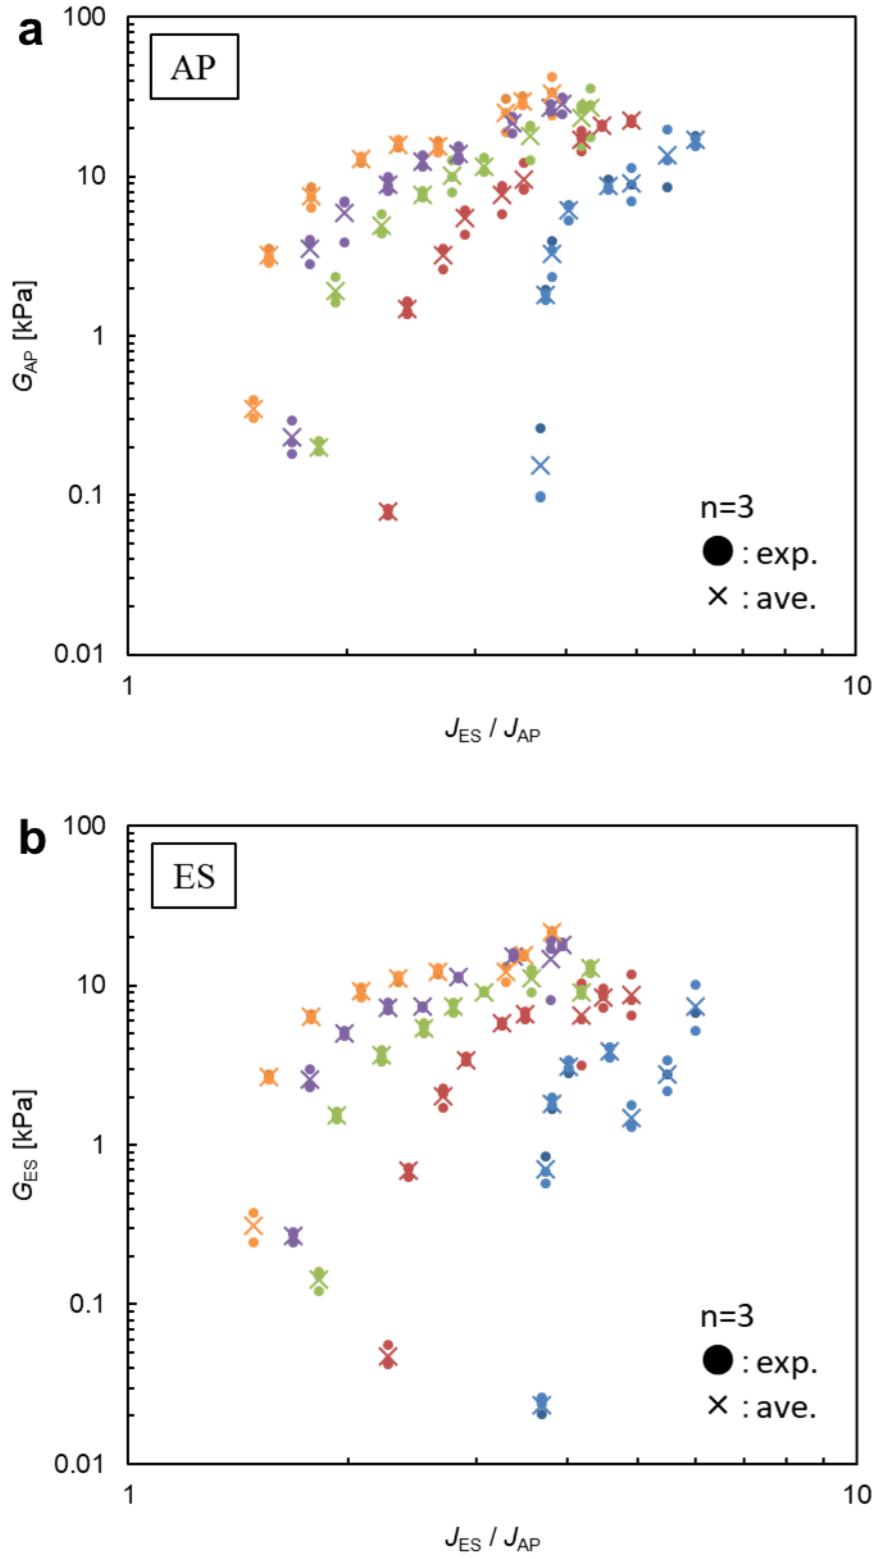

**Figure S1:** Variations for Figs. 3(a) and (b), which shows the double logarithmic plots with base ten for (a)  $G_{AP}$  and (b)  $G_{ES}$  with respect to  $J_{ES}/J_{AP}$ . Note that the sample number is  $n = 3$ .

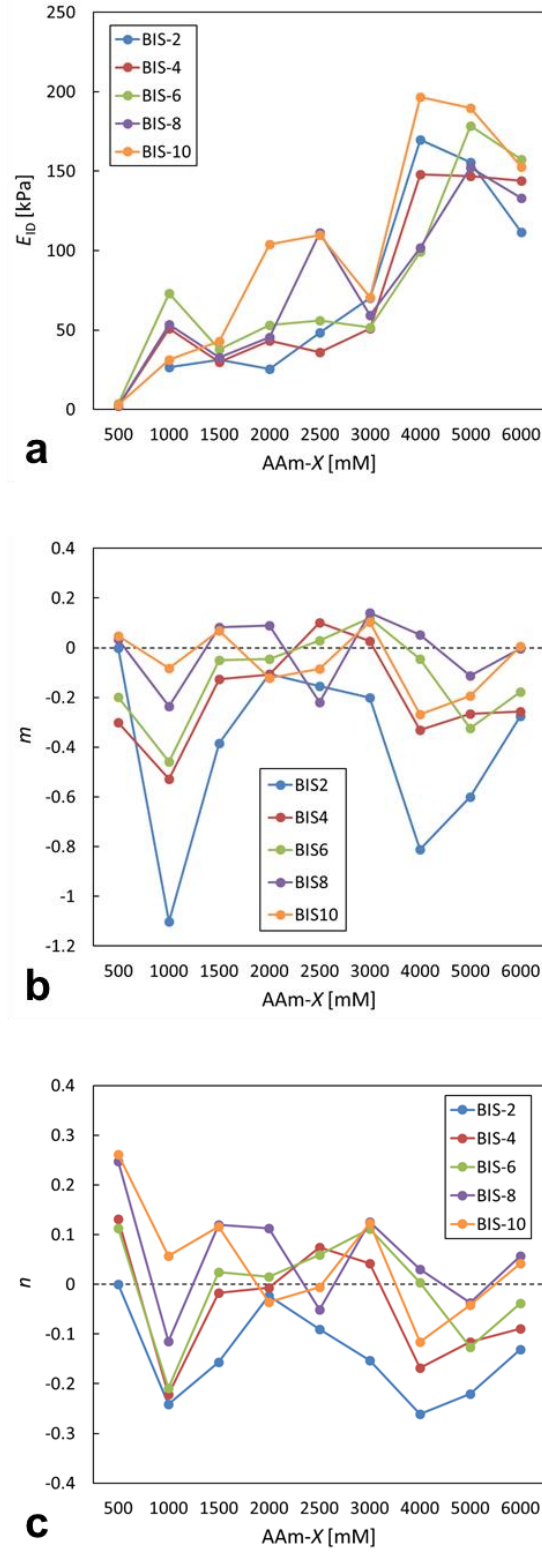

**Figure S2:** Filled circles of (a)  $E_{ID}(X, Y)$  calculated using  $\{J_{AP}, E_{AP}\}$  in Eq. (9), (b)  $m(X, Y)$  calculated using  $\{J_{AP}, J_{ES}, E_{AP}, E_{ES}\}$ , and (c)  $n(X, Y)$  calculated using  $\{J_{ES}, E_{ID}\}$ , where  $a = 0$ ,  $kT = 4.11 \times 10^{-21}$  J,  $v = 2.99 \times 10^{-29}$  m<sup>3</sup>, and  $\chi = 0.49$ .

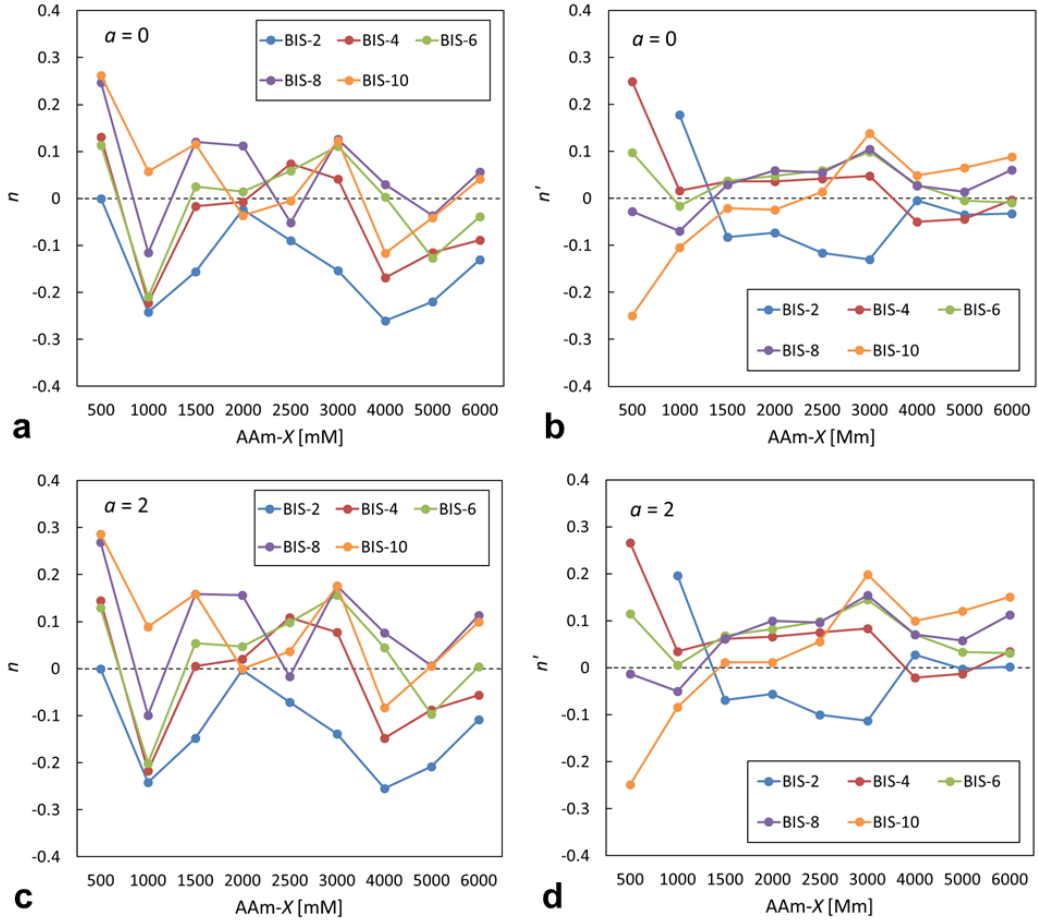

**Figure S3:** Filled circles of (a)  $n(X, Y)$  calculated with  $\{J_{ES}, E_{ID}\}$  and  $a = 0$ , (b)  $n'(X, Y)$  with  $\{J'_{ES}, E'_{ID}\}$  and  $a = 0$ , (c)  $n(X, Y)$  with  $\{J_{ES}, E_{ID}\}$  and  $a = 2$ , and (d)  $n'(X, Y)$  with  $\{J'_{ES}, E'_{ID}\}$  and  $a = 2$ , where,  $kT = 4.11 \times 10^{-21}$  J,  $v = 2.99 \times 10^{-29}$  m<sup>3</sup>, and  $\chi = 0.49$ . Note that Figs. S2(a) and (b) are consistent with Figs. 9(a) and (b) in the main text.

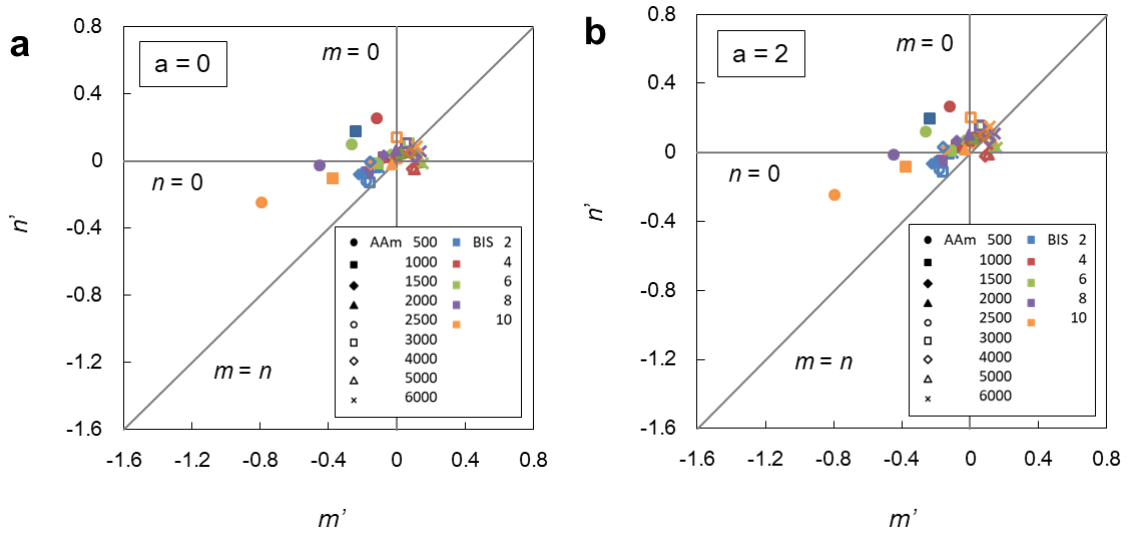

**Figure S4:** Relationship between the two exponents of  $(m', n')$  for (a)  $a = 0$  and (b)  $a = 2$ .

**Table S1:** Volume swelling ratios ( $J_{AP}$  and  $J_{ES}$ ) for each hydrogel formulation.

|         | BIS2     |          | BIS4     |          | BIS6     |          | BIS8     |          | BIS10    |          |
|---------|----------|----------|----------|----------|----------|----------|----------|----------|----------|----------|
|         | $J_{AP}$ | $J_{ES}$ |
| AAm500  | —        | —        | 32.84    | 74.56    | 32.85    | 60.06    | 32.86    | 55.23    | 32.87    | 48.89    |
| AAm1000 | 16.91    | 62.35    | 16.92    | 40.97    | 16.92    | 32.65    | 16.93    | 30.03    | 16.93    | 26.43    |
| AAm1500 | 11.61    | 43.42    | 11.61    | 31.45    | 11.62    | 25.86    | 11.62    | 23.03    | 11.62    | 20.72    |
| AAm2000 | 8.96     | 34.17    | 8.96     | 26.04    | 8.96     | 22.78    | 8.96     | 20.37    | 8.97     | 18.73    |
| AAm2500 | 7.37     | 29.61    | 7.37     | 24.00    | 7.37     | 20.54    | 7.37     | 18.70    | 7.37     | 17.31    |
| AAm3000 | 6.30     | 28.80    | 6.31     | 22.08    | 6.31     | 19.42    | 6.31     | 17.93    | 6.31     | 16.80    |
| AAm4000 | 4.98     | 24.41    | 4.98     | 20.86    | 4.98     | 17.79    | 4.98     | 16.81    | 4.98     | 16.46    |
| AAm5000 | 4.18     | 22.99    | 4.18     | 18.74    | 4.18     | 17.54    | 4.19     | 15.91    | 4.19     | 14.60    |
| AAm6000 | 3.65     | 21.93    | 3.65     | 17.94    | 3.65     | 15.74    | 3.65     | 14.43    | 3.66     | 13.97    |

**Table S2:** Standard deviations of  $\alpha_{AP}$ ,  $\alpha_{ES}$ , and  $\beta$  under the as-prepared and equilibrium stable states of hydrogels as listed in Table 3.

| AP             | BIS-2 | BIS-4 | BIS-6 | BIS-8 | BIS-10 |
|----------------|-------|-------|-------|-------|--------|
| $\delta\alpha$ | 1.95  | 0.37  | 0.43  | 0.79  | 2.71   |
| $\delta\beta$  | 1.71  | 0.33  | 0.30  | 0.40  | 0.97   |
| $R^2$          | 0.889 | 0.993 | 0.992 | 0.982 | 0.876  |
| ES             | BIS-2 | BIS-4 | BIS-6 | BIS-8 | BIS-10 |
| $\delta\alpha$ | 0.05  | 0.02  | 0.06  | 0.12  | 0.16   |
| $\delta\beta$  | 0.09  | 0.03  | 0.05  | 0.08  | 0.07   |
| $R^2$          | 0.920 | 0.995 | 0.998 | 0.990 | 0.987  |

Note that each of the standard deviations was calculated according to the following equations:

$$\delta\alpha = \left( \frac{1}{\langle x^2 \rangle - \langle x \rangle^2} \frac{\langle \varepsilon^2 \rangle}{(n-2)} \right)^{1/2},$$

$$\delta\beta = \left( \frac{\langle x^2 \rangle}{\langle x^2 \rangle - \langle x \rangle^2} \frac{\langle \varepsilon^2 \rangle}{(n-2)} \right)^{1/2} = \sqrt{\langle x^2 \rangle} \delta\alpha,$$

where  $x$  and  $n$  are the observed values of the sample and the sample number, respectively,  $\varepsilon$  represents the irreducible error, and  $R^2$  stands for the total variance.
